# Supplementary material
Source: publisher figshare collection journal article supplement (https://tandf.figshare.com/ndownloader/files/14132696)
Supplement: Supplementary file 1 [file 14132696]

**Supplement**

**Supplement table legends**

**Table S1: Demographics of included studies in the meta-analysis part of Cardiff model**

**Table S2: Baseline demographics in dapagliflozin treatment and metformin treatment as first line therapy, second line therapy and third therapy**

**Table S3: Annual treatment costs for different drugs**

**Table S4: Annual direct medical costs for diabetes-related complications and adverse events**

**Table S5: Body mass index (BMI) associated costs**

**Table S6: Health state utility decrements**

**Table S7: Input data for the univariate sensitivity analyses**

**Table S8: Absolute changes from baseline in dapagliflozin treatment and metformin treatment as first line therapy, second line therapy and third therapy**

**Table S9: Risks of the adverse effects in dapagliflozin treatment and metformin treatment as first line therapy, second line therapy and third therapy**

**Table S10: The results of univariate sensitivity analyses**

**Supplement figure legends**

**Figure S1: Funnel plot of included studies with metfromin treatment**

**Figure S2: Funnel plot of included studies with dapagliflozin treatment**

**Supplement method**

**Supplement references**

**Table S1: Demographics of included studies in the meta-analysis part of Cardiff model**

| **Author ,**  **year** | **Study duration** | **Treatment group** | **No. of patients** | **Age (years)** | **Men (%)** | **BMI (kg/m2)** | **DM duration**  **(years)** | **Baseline HbA1c (%)** |
| --- | --- | --- | --- | --- | --- | --- | --- | --- |
| **First line therapy strategy (SGLT-2 inhibitors vs metformin as monotherapy)** | | | | | | | | |
| Henry[1], 2012 | 24weeks | dapagliflozin5mg | 203 | 52.3±10.2 | 45.3 | / | 1.6±3.1 | 9.1±1.4 |
|  |  | MET 2000mg | 201 | 51.8±9.8 | 47.3 | / | 1.6±2.6 | 9.2±1.3 |
|  |  | dapagliflozin10mg | 219 | 51.1±11.5 | 47.9 | / | 2.1±3.8 | 9.1±1.3 |
|  |  | MET 2000mg | 208 | 52.7±10.4 | 46.6 | / | 1.9±4.0 | 9.1±1.3 |
| **Second line therapy strategy (SGLT-2 inhibitors add on SU/TZD/DPP4i versus Placebo)** | | | | | | | | |
| Rosenstock[2], 2012 | 48weeks | dapagliflozin10mg+ pioglitazone | 140 | 53.8±10.4 | 42.1 | / | 5.75±6.44 | 8.37±0.96 |
|  |  | placebo+ pioglitazone | 139 | 53.5±11.4 | 51.1 | / | 5.07±5.05 | 8.34±1 |
| Strojek[3], 2011 | 24weeks | dapagliflozin10mg+  glimepiride4mg | 151 | 58.9±8.32 | 43.7 | / | 7.2±5.5 | 8.07±0.79 |
|  |  | placebo+  glimepiride4mg | 145 | 60.3±10.1 | 49 | / | 7.4±5.7 | 8.15±0.74 |
| **Second line therapy strategy (MET add on SU/TZD/DPP4i versus Placebo)** | | | | | | | | |
| Ahrén[4], 2004 | 12 weeks | LAF237 50mg qd+MET | 56 | 57.9 ± 10.0 | 69.6 | 29.4± 3.6 | 5.6 ± 4.2 | 7.7 ± 0.6 |
|  |  | Placebo+MET | 51 | 55.7 ± 11.0 | 66.7 | 30.2 ± 3.6 | 5.5± 3.7 | 7.8 ± 0.7 |
| Barnett[5], 2013 | 24weeks | Linagliptin 5mg qd+MET/SU | 162 | 74.9±4.4 | 71.6 | 29.6±4.7 | / | 7.8±0.8 |
|  |  | Placebo+MET/SU | 79 | 74.9±4.2 | 62.0 | 29.8±4.5 | / | 7.7±0.7 |
| Bergenstal[6], 2012 | 24weeks | Placebo+MET | 90 | 56.1±10.1 | 52 | 32.5±5.5 | 5.5±3.9 | 8.03±0.83 |
|  |  | Sitagliptin 100mg+MET | 177 | 55.5±9.9 | 59 | 32.4±5 | 6.0±5.0 | 7.94±0.85 |
| Berhanu[7], 2007 | 20 weeks | Pioglitazone 45mg+MET | 110 | 52.9±11.33 | 43.6 | 30.7±6.09 | 7.7±6.15 | 8.4±0.13 |
|  |  | placebo+MET | 112 | 52.5±11.07 | 41.1 | 31.8±6.2 | 8.5±5.43 | 8.6±0.13 |
| Borges[8], 2011 | 80weeks | Rosiglitazone +MET | 344 | 51.5 | 53 | 32.2 | 2.3 | 8.6±0.9 |
|  |  | placebo+MET | 334 | 50.7 | 53 | 33.1 | 2.6 | 8.6±0.9 |
| Bosi[9], 2007 | 24 weeks | vildagliptin50mg+MET | 143 | 54.3±9.7 | 57.3 | 32.1±5.3 | 6.8±5.5 | 8.4±0.9 |
|  |  | Vildagliptin100mg+MET | 143 | 53.9±9.5 | 61.5 | 32.9±5.0 | 5.8±4.7 | 8.4±1.0 |
|  |  | Placebo+MET | 130 | 54.5±10.3 | 53.1 | 33.2±6.1 | 6.2±5.3 | 8.3±0.9 |
| Bosi[10], 2011 | 52weeks | MET+ Pioglitazone 30mg+Alogliptin25mg | 404 | 54.3±9.86 | 52.0 | 31.5±5.25 | 7.5±5.24 | 8.2±0.86 |
|  |  | MET+Pioglitazone45mg | 399 | 55.9±9.94 | 51.1 | 31.6±5.18 | 6.9±4.61 | 8.1±0.83 |
| Brackenridge[11], 2009 | 12weeks | MET+ Rosiglitazone 8mg | 8 | 66.5±2.51 | 50 | 30.0±1.5 | 4.4±1.03 | 6.9±0.3 |
|  |  | MET+ Pioglitazone 30mg | 8 | 61.0±3.93 | 87.5 | 30.8±1.26 | 4.0±0.8 | 7.5±0.21 |
|  |  | placebo+met | 8 | 60.8±3.45 | 87.5 | 32.0±1.56 | 2.9±0.4 | 6.6±0.14 |
| Charbonnel[12], 2006 | 24 weeks | Sitagliptin 100mg qd+MET | 454 | / | / | / | / | 7.96±0.81 |
|  |  | Placebo+MET | 226 | / | / | / | / | 8.03±0.82 |
| Chen[13], 2016 | 24weeks | Saxagliptin+MET | 36 | 63.7±6.3 | 58.1 | 22.9±3.09 | 5.1±5.0 | 8.38±0.69 |
|  |  | Vildagliptin+MET | 37 | 62.1±6.8 | 52.4 | 24.1±4.27 | 5.1±4.0 | 8.33±0.67 |
| Dailey[14], 2004 | 24 weeks | Rosiglitazone＋glyburide/MET | 181 | 57±9 | 58 | 32±5 | 9±7 | 8.1±0.9 |
| placebo＋glyburide/MET | 184 | 57±10 | 61 | 32±5 | 9±6 | 8.1±0.8 |
| DeFronzo[15], 2012 | 26 weeks | placebo+MET | 129 | 55.2±9.9 | 47.3 | 30.6±4.8 | 6.0±5.0 | 8.5±0.6 |
|  |  | Alogliptin 25mg+MET | 129 | 53.7±9.3 | 38.8 | 31.5±5.7 | 5.6±4.9 | 8.6±0.7 |
|  |  | Alogliptin 25mg  +PIO 30mg+MET | 130 | 54.4±9.7 | 42.3 | 31.9±5.6 | 6.6±6.0 | 8.5±0.7 |
| Derosa[16], 2008 | 26weeks | MET2.0g+ rosiglitazone | 56 | 55±4 | 46.4 | 28.6±1.9 | 3±1 | 7.8±0.7 |
|  |  | placebo+MET2.0g | 61 | 54±3 | 47.5 | 28.4±1.7 | 4±1 | 8.0±0.9 |
| Derosa[17], 2012 | 12 months | Sitagliptin 100mg qd+MET | 91 | 55.9±8.8 | 46 | 28.1±1.2 | 5.8±2.6 | 8.1±0.8 |
|  |  | Placebo+MET | 87 | 54.8±7.9 | 51 | 28.9±2.0 | 5.4±2.3 | 8.0±0.7 |
| Derosa[18], 2012 | 12 months | Vildagliptin 50mg bid+MET | 84 | 54.2±8.3 | 50 | 27.9±1.5 | 6.1±3.7 | 8.1±0.6 |
|  |  | Placebo+MET | 83 | 52.4±7.1 | 51.8 | 27.8±1.4 | 6.3±3.9 | 8.2±0.7 |
| Dobs[19], 2013 | 18 weeks | Sitagliptin 100mg qd+MET+rosiglitazone | 170 | 54.4±8.8 | 56 | 30.1±6.2 | 9.3±5.9 | 8.8±1.0 |
|  |  | Placebo+MET+rosiglitazone | 92 | 54.8±9.5 | 60 | 30.8±5.6 | 9.4±6.8 | 8.7±1.0 |
| Einhorn[20], 2000 | 16weeks | MET2.0g+ Pioglitazone 30mg | 168 | 55.5±10.34 | 54.8 | 32.11±5.3 | / | 9.86±1.4 |
|  |  | placebo+MET2.0g | 160 | 55.7±9.92 | 60 | 32.12±5.5 | / | 9.75±1.3 |
| Feinglos[21], 2005 | 16weeks | MET1.0g+  glipizide2.5mg | 61 | 57.7±10.7 | 45.9 | 31.7±4.4 | 6.5 | 7.45 |
|  |  | placebo+MET1.0g | 61 | 58.8±10.0 | 41 | 32.1±4.9 | 4.6 | 7.64 |
| Fonseca[22], 2000 | 26weeks | MET2.5g+ rosiglitazone 4mg | 116 | 57.5±10.5 | 62.1 | 30.2±4.2 | 7.5±6.3 | 8.9±1.3 |
|  |  | MET2.5g+ rosiglitazone 8mg | 110 | 58.3±8.8 | 68.2 | 29.8±3.9 | 8.3±6.3 | 8.9±1.5 |
|  |  | placebo2.5g+MET | 113 | 58.8±9.2 | 74.3 | 30.3±4.4 | 7.3±5.7 | 8.6±1.3 |
| Fonseca[23], 2013 | 26weeks | Sitagliptin100mg+MET+ pioglitazone | 157 | 55.7±8.7 | 61.8 | 29.9±5.2 | 9.4±5.8 | 8.8±1.0 |
|  |  | Placebo+MET+ pioglitazone | 156 | 56.4±9.4 | 62.8 | 30.0±5.2 | 10.2±6.1 | 8.7±1.0 |
| Forst[24], 2010 | 12 weeks | Linagliptin 5mg+MET | 66 | 59.6±9.8 | 56.1 | 31.7±4.5 | 7.3±7.5 | 8.5±0.8 |
|  |  | Glimepiride+MET | 65 | 59.4±9.9 | 63.1 | 31.5±4.2 | 6.7±5.9 | 8.2±0.7 |
|  |  | Placebo+MET | 71 | 60.1±8.1 | 62 | 32.2±4.2 | 6.2±5.1 | 8.4±0.7 |
| Garber[25], 2002 | 20  weeks | glimepiride2.5mg+  MET500mg | 165 | 58.1 | 58.2 | 29.6 | 3.3 | 8.18±1.14 |
|  |  | glimepiride2.5mg | 161 | 56.5 | 50.9 | 30.3 | 2.81 | 8.21±1.09 |
| Garber[26], 2003 | 16  weeks | glimepiride1.25mg+  MET500mg | 171 | 55.6 | 44.4 | 31.4 | 3 | 8.8±1.5 |
|  |  | glimepiride1.25mg | 151 | 55.3 | 43.7 | 31.1 | 3 | 8.7±1.4 |
| Gòmez-Perez[27], 2002 | 26weeks | MET2.5g+RSG4mg | 35 | 54.2±9.3 | 28.6 | 28.0±4.0 | 11.1±7.1 | / |
|  |  | MET2.5g+RSG8mg | 36 | 51.7±8.6 | 19.4 | 27.6±3.2 | 10.7±7.0 | / |
|  |  | placebo+MET2.5g | 34 | 53.4±7.5 | 29.4 | 28.5±3.9 | 9.1±5.6 | / |
| Goodman[28], 2009 | 24 weeks | Vildagliptin 100mg qd+MET | 248 | 54.9±10.8 | 52.8 | 31.4±4.7 | / | 8.5±1 |
|  |  | placebo+MET | 122 | 54.5±9.7 | 67.2 | 31.7±4.3 | / | 8.7±1.1 |
| Haak[29], 2012 | 24 weeks | Placebo+MET500 mg bid | 144 | 52.9±10.4 | 56.9 | 28.9±4.8 | / | 8.7±0.9 |
|  |  | Placebo+MET1000 mg bid | 147 | 55.2±10.6 | 53.1 | 29.5±5.3 | / | 8.5±0.9 |
|  |  | LINA2.5mg+MET500mg | 143 | 55.6±11.2 | 51 | 29.7±5.3 | / | 8.7±1.0 |
|  |  | LINA2.5mg+MET 1000mg bid | 143 | 56.4±10.7 | 53.8 | 28.6±4.8 | / | 8.7±1.0 |
| Hermansen[30], 2007 | 24 weeks | Sitagliptin 100mg qd+Glimepiride±MET | 222 | 55.6±9.6 | 52.7 | 31.2±6.3 | 8.3±5.5 | 8.34±0.76 |
|  |  | Placebo+ Glimepiride±MET | 219 | 56.5±9.6 | 53.4 | 30.7±6.3 | 9.3±6.8 | 8.34±0.74 |
| Jadzinsky[31], 2009 | 24 weeks | Saxagliptin 5mg+MET | 320 | 52.0±10.4 | 51.6 | 29.9±4.5 | 2.0±3.6 | 9.4±1.2 |
|  |  | Saxagliptin 10mg+MET | 323 | 52.1±11.6 | 45.2 | 30.3±5.0 | 1.4±2.5 | 9.5±1.2 |
|  |  | placebo+MET | 328 | 51.8±10.7 | 49.7 | 30.2±4.9 | 1.7±3.1 | 9.4±1.3 |
| Ji[32], 2016 | 24 weeks | Vildagliptin 50mg bid+MET | 2501 | 56.5±10.6 | 54.4 | 25.1±3.2 | 4.3±4.2 | 7.2±0.02 |
|  |  | Placebo+MET | 484 | 56.2±10.8 | 49.6 | 25.1±3.2 | 4.1±4.3 | 7.2±0.04 |
| Kaku[33], 2009 | 28 weeks | pioglitazone 30mg+MET | 83 | 52±8.6 | 66.3 | 25.6±4.2 | 4.5±3.7 | 7.58±1.0 |
|  |  | placebo+MET | 86 | 53±7.5 | 57 | 25.4±3.6 | 5.6±5.0 | 7.55±0.9 |
| Lavalle-González[34], 2013 | 26  weeks | Placebo+MET | 183 | 55.3±9.8 | 51.4 | 31.1±6.1 | 6.8±5.3 | 8.0±0.9 |
| Sitagliptin100mg+MET | 366 | 55.3±9.8 | 47 | 32.0±6.1 | 6.8±5.2 | 7.9±0.9 |
| Lv[35], 2013 | 12 weeks | Saxa+MET | 90 | 44±7 | 51.4 | 30±6 | / | 7.83±0.29 |
|  |  | Acarbose+MET | 90 | 44±7 | 52.6 | 30±4 | / | 7.18±0.27 |
| Lukashevic[36], 2014 | 24  weeks | Vildagliptin 50mg bid+MET+Glimepiride | 158 | 55.3±10.2 | 50.6 | 27.9±4.6 | 7.1±6.2 | 8.7±0.9 |
|  |  | Placebo+MET+Glimepiride | 160 | 55.0±11.1 | 45% | 28.0±4.5 | 7.5±6.1 | 8.8±0.9 |
| Li[37], 2014 | 24weeks | Saxagliptin+MET | 66 | 46.5±10.7 | 59 | 26.9±3.1 | / | 8.86±1.13 |
|  |  | Vildagliptin+MET | 63 | 44.8±8.5 | 59 | 25.3±2.8 | / | 8.75±1.15 |
|  |  | Sitagliptin+MET | 61 | 48.6±11.3 | 54 | 26.6±3.3 | / | 8.54±1.19 |
| Du[38], 2016 | 24weeks | Saxagliptin+MET | 238 | / | / | / | / | / |
|  |  | Acarbose +MET | 243 | / | / | / | / | / |
| Nauck[39], 2009 | 26weeks | MET2.0g+  glimepiride4mg | 244 | 57±9 | 57 | 31.2±4.6 | 8±5 | 8.4±1 |
|  |  | placebo+MET2.0g | 121 | 56±9 | 60 | 31.6±4.4 | 8±6 | 8.4±1.1 |
| Nauck[40], 2009 | 26 weeks | Placebo+MET | 104 | 56±11 | 48 | 32±6 | 6±5 | 8.0±0.9 |
|  |  | Alogliptin 12.5mg+ MET | 213 | 55±11 | 47.4 | 32±5 | 6±5 | 7.9±0.7 |
|  |  | Alogliptin 25mg+ MET | 210 | 54±11 | 54.3 | 32±5 | 6±4 | 7.9±0.8 |
| Negro**[41]**, 2005 | 52weeks | MET2.5g+ rosiglitazone 8mg | 19 | 60.3±6.4 | 52.6 | 28.3±1.7 | 7.1±2.4 | 8.4±0.6 |
|  |  | placebo+MET2.5g | 19 | 59±8 | 63.2 | 28.7±1.9 | 6.6±2.9 | 8.1±0.5 |
| Owens**[42]**, 2011 | 24 weeks | Linagliptin 5 mg+MET+SU | 792 | 58.3±9.9 | 46.8 | 28.4±4.8 | / | 8.15±0.03 |
|  |  | Placebo+MET+SU | 263 | 57.6±9.7 | 48.3 | 28.2±4.5 | / | 8.14±0.05 |
| Pan**[43]**, 2002 | 12 weeks | pioglitazone 30mg  +SU+MET | 141 | / | / | / | / | 8.5±1.34 |
|  |  | PBO+SU+MET | 142 | / | / | / | / | 8.5±1.12 |
| Pan[44], 2012 | 24 weeks | Vildagliptin 50mg bid+ MET | 146 | 54.2±9.62 | 50 | 26.01±3.26 | 4.92±4.8 | 8.09±0.85 |
|  |  | Vildagliptin 50 mg qd+ MET | 146 | 53.7±10.0 | 44.6 | 25.03±3.09 | 5.02±4.42 | 8.05±0.84 |
|  |  | Placebo+MET | 144 | 54.5±9.68 | 45.8 | 25.46±3.09 | 5.15±4.58 | 8.01±0.82 |
| Pan[45], 2015 | 16 weeks | Alo+MET | 91 | 52.6±9.8 | 53.3 | 25.7±3.1 | 5.3±4.2 | 8.05±0.83 |
|  |  | Placebo+MET | 93 | 53.4±9.4 | 48.9 | 25.5±3.9 | 5.5±3.9 | 7.98±0.75 |
| Perez[46], 2009 | 24weeks | pioglitazone15mg+MET | 201 | 54.7 | 44.8 | 30.8 |  | 8.89±0.07 |
|  |  | Placebo+MET | 210 | 53.7 | 46.7 | 30.8 |  | 8.65±0.07 |
| Raz[47], 2008 | 18 weeks | Sitagliptin 100mg qd+MET | 96 | 53.6±9.5 | 51 | 30.1±4.4 | 8.4±6.5 | 9.3±0.9 |
|  |  | placebo+MET | 94 | 56.1±9.5 | 41.5 | 30.4±5.3 | 7.3±5.3 | 9.1±0.8 |
| Roberts[48], 2005 | 26 weeks | glimepiride8mg+  MET+SU | 82 | 56.5±9.8 | 61 | 33.98±5.15 | 8.7±6.8 | 8.15±0.76 |
|  |  | PBO+MET+SU | 77 | 56.4±10.0 | 62.3 | 32.76±5.11 | 7.9±4.9 | 8.15±0.65 |
| Rosenstock[49], 2006 | 32weeks | rosiglitazone +MET | 155 | 50.1 | 57 | 33.2 | 2.3 | 8.9±1.1 |
|  |  | placebo+MET | 154 | 51.5 | 56 | 32.5 | 2.9 | 8.8±1 |
| Rosenstock[50], 2012 | 12 weeks | sitagliptin 100mg Qd+MET | 65 | 51.7±8.1 | 58 | 31.6±5.0 | 5.6±4.7 | 7.64±0.95 |
|  |  | PBO+MET | 65 | 53.3±7.8 | 48 | 30.6±4.6 | 6.4±5.0 | 7.75±0.83 |
| Ross[51], 2012 | 12 weeks | Linagliptin 2.5mg+ MET | 214 | 58.7±9.9 | 61.9 | 29.8±5.2 | / | 7.96±0.78 |
|  |  | Linagliptin 5mg+ MET | 221 | 58.4±10.6 | 54 | 29.6±5.0 | / | 7.98±0.72 |
|  |  | Placebo+ MET | 43 | 59.9±10.7 | 47.7 | 28.7±5.5 | / | 7.92±0.74 |
| Scheen[52],2009 | 155weeks | MET2.5g+ pioglitazone 45mg | 253 | 60.8±7.6 | 70 | 31.9±4.7 | 5.1±5.1 | 7.6±1.3 |
|  |  | placebo+MET2.5g | 261 | 60.3±7.9 | 67 | 32.0±5.3 | 5.6±5.4 | 7.6±1.2 |
| Scott[53], 2008 | 18 weeks | Sitagliptin 100mg qd+MET | 94 | 55.2±9.8 | 55 | 30.3±4.7 | 4.9±3.5 | 7.8±1.0 |
|  |  | placebo+MET | 92 | 55.3±9.3 | 59 | 30.0±4.5 | 5.4±3.7 | 7.7±0.9 |
|  |  | Rosiglitazone+MET | 87 | 54.8±10.5 | 63 | 30.4±5.5 | 4.6±4 | 7.7±0.8 |
| Seino[54], 2012 | 24 weeks | Alogliptin 12.5 mg od +MET | 92 | 53.4 ±8.80 | 65.2 | 25.63 ±4.10 | 6.34 ±5.39 | 7.89 ±0.82 |
|  |  | Alogliptin 25 mg od +MET | 96 | 52.3 ±8.02 | 68.8 | 25.79 ±3.70 | 6.62 ±4.80 | 8.02 ±0.73 |
|  |  | Placebo + MET | 100 | 52.1 ±8.05 | 72 | 26.14 ±4.58 | 6.04 ±4.36 | 8.00 ±0.86 |
| Sridhar[55], 2013 | 24 weeks | pioglitazone 30mg  +glimepide+MET | 25 | 47.9±5.8 | 100 | 25.3±2.7 | 2.2±1.7 | 6.8±0.4 |
|  |  | placebo+glimepide+MET | 25 | 44.0±7.2 | 100 | 25.1±3.2 | 2.9±2.1 | 6.8±0.4 |
| Stewart[56], 2006 | 32weeks | rosiglitazone +MET | 254 | 58.9 | 55 | 30.9 | 3.7 | 7.2±0.6 |
|  |  | placebo+MET | 272 | 59 | 56 | 30.6 | 3.7 | 7.2±0.6 |
| Taskinen[57], 2011 | 24 weeks | Placebo+MET | 177 | 56.6±10.9 | 57 | 30.05±5.01 | / | 8.02±0.88 |
|  |  | Linagliptin 5mg qd+MET | 523 | 56.5±10.1 | 53 | 29.85±4.84 | / | 8.09±0.86 |
| Wang[58], 2015 | 24 weeks | Linagliptin+MET | 184 | 55.1±10.7 | 49.8 | 25.5±3.9 | / | 7.99±0.83 |
|  |  | Placebo+MET | 80 | 56.5±8.7 | 50 | 25.8±4.0 | / | 8.00±0.80 |
| Yale[59], 2001 | 24 weeks | troglitazone400mg+MET+SU | 101 | 58±0.9 | 55 | 30.1±0.5 | 11.9±0.8 | 9.6±0.1 |
|  |  | placebo+MET+SU | 99 | 60±0.9 | 58 | 30.0±0.4 | 10.8±0.6 | 9.7±0.1 |
| Yang[60], 2011 | 24 weeks | Saxagliptin 5mg qd+MET | 283 | 53.8 ±10.4 | 48.1 | 26.3 ±3.6 | 5.1 ±5.0 | 7.9 ±0.8 |
|  |  | Placebo+MET | 287 | 54.4 ±10.1 | 48.7 | 26.1 ±3.5 | 5.1 ±4.0 | 7.9±0.8 |
| Yang[61], 2012 | 24 weeks | Sitagliptin 100mg qd+MET | 197 | 54.1±9.0 | 47 | 25.3±3.1 | 6.4±4.4 | 8.5±0.9 |
|  |  | Placebo+MET | 198 | 55.1±9.8 | 55 | 25.3±3.6 | 7.3±4.6 | 8.5±0.9 |
| **Third line therapy strategy (SGLT-2 addon INS versus Placebo)** | | | | | | | | |
| Araki[62], 2016 | 16weeks | dapagliflozin5mg+ins | 122 | 58.3 | 73 | 26.89 | 15.32 | 8.26±0.79 |
|  |  | placebo+ins | 60 | 57.6 | 66.7 | 26.12 | 14.24 | 8.52±0.94 |
| Cefalu[63], 2015 | 52weeks | dapagliflozin10mg+  OAD/ins | 455 | 62.8±7.0 | 67.9 | 32.6±5.9 | 12.6±8.7 | 8.18±0.84 |
|  |  | placebo+OAD/ins | 459 | 63.0±7.7 | 68.6 | 32.9±6.1 | 12.3±8.2 | 8.08±0.8 |
| Wilding[64], 2009 | 12weeks | dapagliflozin10mg+ins | 24 | 55.7±9.2 | 54.2 | 35.5±3.6 | 11.8±5.8 | 8.4±0.7 |
|  |  | placebo+ins | 23 | 58.4±6.5 | 69.6 | 34.8±4.6 | 13.8±7.3 | 8.4±0.9 |
| Wilding[65], 2012 | 48weeks | dapagliflozin10mg+ins | 194 | 59.3±8.8 | 44.8 | 33.4±5.1 | 14.2±7.3 | 8.57±0.82 |
|  |  | palcebo+ins | 193 | 58.8±8.6 | 49.2 | 33.1±5.9 | 13.5±7.3 | 8.47±0.77 |
| **Third line therapy strategy (MET addon INS versus Placebo)** | | | | | | | | |
| Avilés-Santa[66], 1999 | 24 weeks | MET2.5g+ins | 21 | 53.1±9.4 | 28.6 | / | 9.2±6.4 | 9.0±1.4 |
| placebo+ins | 22 | 54.6±7.8 | 45.5 | / | 10.1±4.7 | 9.1±1.5 |
| Douek[67], 2005 | 52weeks | MET2.0g+ins | 92 | 58±8.9 | 67.4 | 30.9±4.5 | 9±5.2 | 9.7±1.3 |
| placebo+ins | 91 | 58±7.7 | 62.6 | 31.5±4.3 | 10±5.2 | 10.0±1.5 |
| Gram[68], 2011 | 104weeks | MET2.0g+NPH | 45 | 55.4 | 57.8 | 35.4 | 8.2 | 8.9±1.2 |
| placebo+NPH | 46 | 55.8 | 71.7 | 34 | 7.3 | 8.7±1.3 |
| Gram-2[68], 2011 | 104weeks | MET2.0g+ASP | 45 | 56.1 | 62.2 | 33.7 | 8.7 | 8.5±1.2 |
| placebo+ASP | 48 | 57.1 | 47.9 | 33.7 | 9.1 | 8.5±1.2 |
| Hermann[69], 2001 | 52 weeks | MET1.7g+ins | 16 | 56.9±10.2 | 43.8 | 33.6±3.5 | 13 | 9.1±1.3 |
| placebo+ins | 19 | 58.1±9.7 | 63.2 | 32.6±3.8 | 13 | 8.7±1.0 |
| Kooy[70], 2009 | 224weeks | MET2.55g+ins | 196 | 64±10 | 41.3 | 30±5 | 14±9 | 7.9±1.2 |
| placebo+ins | 194 | 59±11 | 50 | 30±5 | 12±8 | 7.9±1.2 |

**Table S2: Baseline demographics in dapagliflozin treatment and metformin treatment as first line therapy, second line therapy and third therapy**

|  | **First line therapy** | | **Second line therapy** | | **Third line therapy** | |
| --- | --- | --- | --- | --- | --- | --- |
| **Variables** | **Dapagliflozin monotherapy** | **Metformin monotherapy** | **Dapagliflozin add on SU/TZD** | **Metformin add on SU/TZD** | **Dapagliflozin add on insulin** | **Metformin add on insulin** |
| n. | 219 | 208 | 291 | 3127 | 795 | 415 |
| Age (year) | 51.5±11.5 | 52.7±10.4 | 56.50±3.54 | 56.25±3.95 | 59.00±2.94 | 57.17±3.76 |
| Gender (female percent) | 52.1% | 53.4% | 43.0% | 57.9% | 60.00% | 50.17% |
| BMI(kg/m2) | / | / | / | 30.08±2.33 | 32.25±3.78 | 33.00±2.45 |
| Diabetes duration(year) | 2.1±3.8 | 1.9±4.0 | 6.50±0.71 | 6.05±3.18 | 13.50±1.29 | 10.33±2.50 |
| HbA1c(%) | 9.1±1.3 | 9.1±1.3 | 8.00±0.00 | 8.26±0.86 | 8.25±0.50 | 8.83±0.75 |
| Weight(kg) | 88.5±19.3 | 87.2±19.4 | 83.00±2.83 | 88.75±7.62 | 91.00±12.19 | 96.33±8.31 |
| SBP(mmHg) | 127.8±13.7 | 130.6±15.2 | 132.00 | 132.75±1.50 | 135.33±5.13 | 153.67±7.10 |
| DBP(mmHg) | 80.1±8.0 | 80.7±8.2 | 79.00 | 81.25±3.50 | 78.67±1.53 | 84.67±1.16 |
| TCHO(mmol/l) | / | / | 5.00 | 5.05±0.21 | 4.00 | 5.65±0.47 |
| TG(mmol/l) | / | / | 2.00 | 2.30±0.84 | 2.00 | 2.42±0.68 |
| LDLC(mmol/l) | / | / | 3.00 | 2.89±0.29 | 2.00 | 3.53±0.50 |
| HDLC(mmol/l) | / | / | 1.00 | 1.12±0.13 | 1.00 | 1.07±0.15 |
| SUA(umol/l) | 302.2±85.7 | 302.8±77.3 | 301.00±82.4 | / | 325.00 | / |

**Table S3: Annual treatment costs for different drugs.**

| **Drug Type** | **Size (tablets/capsules)** | **Price per package** | **Annual Utilization (tablets per patient)** | **Annual Cost** |
| --- | --- | --- | --- | --- |
| Metformin | 20 | 25.0 | 1277.5 | 1596.0 |
| Dapagliflozin | 14 | 229.6 | 365 | 5985.8 |
| SU/TZD/DPP4 inhibitors |  |  |  | 2818.4 |
| Gliclazide | 30 | 57.7 | 1095 | 2106.4 |
| Glimepiride | 15 | 66.8 | 730 | 3251.4 |
| Glipizide | 30 | 32.3 | 912.5 | 982.7 |
| Pioglitazone | 7 | 43.9 | 365 | 2287.2 |
| Rosiglitazone | 7 | 65.6 | 365 | 3419.0 |
| Saxagliptin | 7 | 59.2 | 365 | 3085.6 |
| Sitagliptin | 7 | 73.4 | 365 | 3825.3 |
| Linagliptin | 7 | 61.2 | 365 | 3193.7 |
| Vildagliptin | 14 | 61.6 | 730 | 3214.4 |

SU: sulfonylurea; TZD: thiazolidinedione; DPP4: Dipeptidyl peptidase-4

* Annual cost for SU/TZD/DPP4 inhibitors was calculated as (¥2106.4 + ¥3251.4 + ¥982.7 + ¥2287.2 + ¥3419.0+ ¥3085.6+ ¥3825.3+ ¥3193.7+ ¥3214.4)/5 = ¥2818.4, due to the lack of utilization pattern of these drugs.

** Annual cost for “metformin add on SU/TZD/DPP4 inhibitors” was ¥1596 + ¥2818.4 = ¥4414.4, and that for “dapagliflozin add on SU/TZD/DPP4 inhibitors” was ¥5985.8 + ¥2818.4 = ¥8804.2 in 2016.

**Table S4: Annual direct medical costs for diabetes-related complications and adverse events**

| **Event** | **Fatal** | **Non-fatal** | **Maintenance** |
| --- | --- | --- | --- |
| Ischemic heart disease | \ | 38660.37 | 6901.83 |
| Myocardial infarction | 46092.75 | 46092.75 | 10588.1 |
| Congestive heart failure | 15328.57 | 15328.57 | 9317.53 |
| Stroke | 13922.2 | 17964.09 | 8089.54 |
| Blind | \ | 11930.02 | 9207.04 |
| End stage renal disease | \ | 113521.66 | 91084.11 |
| Amputation | 18055.01 | 18055.01 | 14391.76 |
| Ulcer | \ | 14190.51 | 4994.42 |
| Severe hypoglycemia | \ | 3787.91 | \ |
| Genital infection | \ | 201.7 | \ |
| Urinary infection | \ | 201.7 | \ |

**Table S5: Body mass index (BMI) associated costs**

| **BMI (kg/m2)** | **Annual Cost (Chinese Yuan)** |
| --- | --- |
| 20 | 0 |
| 21 | 0 |
| 22 | 0 |
| 23 | 0 |
| 24 | 1574.4 |
| 25 | 3877.9 |
| 26 | 6181.4 |
| 27 | 8484.9 |
| 28 | 10788.4 |
| 29 | 13091.9 |
| 30 | 15395.4 |
| 31 | 17698.9 |
| 32 | 20002.4 |
| 33 | 22305.9 |
| 34 | 24609.4 |
| 35 | 26912.9 |
| 36 | 29216.4 |
| 37 | 31519.9 |
| 38 | 33823.4 |
| 39 | 36126.9 |
| 40+ | 38430.40 |

**Table S6: Health state utility decrements**

| **Event** | **Utility Decrement** |
| --- | --- |
| Ischemic heart disease | 0.09 |
| Myocardial infarction | 0.055 |
| Congestive heart failure | 0.108 |
| Stroke | 0.164 |
| Blind | 0.074 |
| End-stage renal disease | 0.263 |
| Amputation | 0.28 |
| Ulcer | 0.059 |
| Symptomatic hypoglycemia | 0.0142 |
| Severe hypoglycemia | 0.047 |
| Urinary tract infection | 0.003 |
| Genital infection | 0.003 |
| Gastrointestinal side effects | 0.04 |
| Per unit decrease in BMI | 0.0171 |
| Per unit increase in BMI | 0.0472 |

**Table S7: Input data for the univariate sensitivity analyses**

| Parameter Group | Parameter | Upper Value | Lower Value | Variation Type |
| --- | --- | --- | --- | --- |
| Model Settings | Discounting (%) | 0 | 0.06 | Absolute |
| Time horizon (years) | 20 | 5 | Absolute |
| Patient Demographics | Age (years) | 60 | 30 | Absolute |
| Proportion female (%) | 1 | 0 | Absolute |
| Current smoker (%) | 1 | 0 | Absolute |
| Patient Clinical  Risk Factors | HbA1c (%) | 25 | 25 | Percentage |
| Total cholesterol (%) | 25 | 25 | Percentage |
| HDL cholesterol (%) | 25 | 25 | Percentage |
| Systolic blood pressure (mmHg) | 25 | 25 | Percentage |
| Weight (kg) | 25 | 25 | Percentage |
| Treatment | HbA1c treatment effect (%) | 25 | 25 | Percentage |
| Weight treatment effect (kg) | 25 | 25 | Percentage |
| Non-severe hypoglycemia rates | 25 | 25 | Percentage |
| Severe hypoglycemia rates | 25 | 25 | Percentage |
| Adverse event rates | 25 | 25 | Percentage |
| Costs | Event costs | 25 | 25 | Percentage |
| BMI costs | 25 | 25 | Percentage |
| Health Utility | Baseline utility | 25 | 25 | Percentage |
| Event disutility | 25 | 25 | Percentage |
| BMI-related utility | 25 | 25 | Percentage |

**Table S8: Absolute changes from baseline in dapagliflozin treatment and metformin treatment as first line therapy, second line therapy and third line therapy**

| **Variables** | **dapagliflozin** | | | **metformin** | | |
| --- | --- | --- | --- | --- | --- | --- |
|  | **change from baseline** | **95%CI** | **P** | **change from baseline** | **95%CI** | **P** |
| **First line therapy (monotherapy)** | | | | | | |
| HbA1c (%) | -1.45 | -1.59, -1.31 | 0.00 | -1.44 | -1.59, -1.29 | 0.00 |
| Weight (kg) | -2.73 | -3.19, -2.27 | 0.00 | -1.36 | -1.83, -0.89 | 0.00 |
| SBP (mmHg) | -4.01 | 0.9***** | / | -1.2 | 1.0***** | / |
| DBP (mmHg) | -1.9 | 0.5***** | / | 0 | 0.6***** | / |
| TCHO(mmol/l) | / | / | / | / | / | / |
| TG(mmol/l) | / | / | / | / | / | / |
| LDLC(mmol/l) | / | / | / | / | / | / |
| HDLC(mmol/l) | / | / | / | / | / | / |
| SUA(umol/l) | -33.3 | 3.6***** | / | 18.4 | 3.6***** | / |
| **Second line therapy (add on SU/TZD/DPP4i)** | | | | | | |
| HbA1c (%) | -1.008 | -1.723,-0.293 | 0.006 | -1.222 | -1.545, -0.898 | 0.00 |
| Weight (kg) | -0.841 | -1.584, -0.098 | 0.027 | 1.442 | 0.931, 1.953 | 0.00 |
| SBP (mmHg) | -2.2 | -4.552, 0.152 | / | -2.842 | -4.193, -1.491 | 0.00 |
| DBP (mmHg) | -2.4 | -3.772, -1.028 | 0.00 | / | / | / |
| TCHO(mmol/l) | / | / | / | 1.807 | 1.528, 2.086 | 0.00 |
| TG(mmol/l) | / | / | / | -0.089 | -0.477, 0.299 | 0.653 |
| LDLC(mmol/l) | / | / | / | 0.139 | -0.100, 0.379 | 0.255 |
| HDLC(mmol/l) | / | / | / | 0.113 | -0.058, 0.285 | 0.195 |
| SUA(umol/l) | -26.17 | -35.77, -16.57 | / | / | / | / |
| **Third line therapy (add on insulin)** | | | | | | |
| HbA1c (%) | -0.61 | -1.089, -0.132 | 0.012 | -0.752 | -2.008, 0.504 | 0.24 |
| Weight (kg) | -2.578 | -3.23, -1.927 | 0.00 | 3.05 | -14.01,20.11 | 0.726 |
| SBP (mmHg) | -3.734 | -5.747, -1.722 | 0.00 | -12.931 | -27.666,1.804 | 0.085 |
| DBP (mmHg) | -2.668 | -4.733, -0.604 | 0.011 | -6.444 | -21.179, 8.291 | 0.391 |
| TCHO(mmol/l) | -0.09 | -0.698, 0.518 | 0.772 | -0.982 | -2.357, 0.392 | 0.161 |
| TG(mmol/l) | -0.06 | -0.746, 0.626 | 0.864 | -0.31 | -1.684, 1.063 | 0.658 |
| LDLC(mmol/l) | -0.100 | -0.649, 0.449 | 0.721 | -1.311 | -2.962, 0.340 | 0.120 |
| HDLC(mmol/l) | -0.020 | -0.118,0.078 | 0.689 | 0.055 | -0.084, 0.193 | 0.438 |
| SUA(umol/l) | -14.28 | -137.66,109.1 | 0.821 | / | / | / |

*: standard deviation (SD)

SU: sulfonylurea; TZD: thiazolidinedione; DPP4: Dipeptidyl peptidase-4; SBP: systolic blood pressure; DBP: diastolic blood pressure; TCHO: total cholesterol; TG: triglyceride; LDLC: low-density lipoprotein cholesterol; HDLC: high-density lipoprotein cholesterol; SUA: serum uric acd;

**Table S9: Risks of the adverse effects in dapagliflozin treatment and metformin treatment as first line therapy, second line therapy and third line therapy**

| **Variables** | **dapagliflozin** | | | **metformin** |  |
| --- | --- | --- | --- | --- | --- |
| **N** | **Total number** |  | **N** | **Total number** |
| **First line therapy (monotherapy)** |  |  |  |  |  |
| **hypoglycemia** | 2 | 219 |  | 6 | 208 |
| **Genital infection** | 28 | 219 |  | 5 | 208 |
| **Urinary infection** | 24 | 219 |  | 9 | 208 |
| **GI side effects** | 14 | 219 |  | 25 | 208 |
| **Serious side effects** | 5 | 219 |  | 4 | 208 |
| **Therapy discontinuation** | 9 | 219 |  | 8 | 208 |
| **Second line therapy (add on SU/TZD/DPP4i)** | | | | | |
| **hypoglycemia** | 12 | 291 |  | 319 | 3011 |
| **Genital infection** | 22 | 291 |  | / | / |
| **Urinary infection** | 15 | 291 |  | 6 | 201 |
| **GI side effects** | 113 | 291 |  | 1056 | 3036 |
| **Serious side effects** | 11 | 291 |  | 62 | 1923 |
| **Therapy discontinuation** | 7 | 291 |  | 303 | 2606 |
| **Third line therapy (add on insulin)** |  |  |  |  |  |
| **hypoglycemia** | 252 | 795 |  | 10 | 325 |
| **Genital infection** | 50 | 795 |  | / | / |
| **Urinary infection** | 49 | 795 |  | / | / |
| **GI side effects** | 236 | 795 |  | 69 | 415 |
| **Serious side effects** | 88 | 795 |  | / | / |
| **Therapy discontinuation** | 70 | 795 |  | 95 | 399 |

**Table S10: The results of univariate sensitivity analyses**

| Parameter | Variation | Incremental | | ICER (¥/QALY) |
| --- | --- | --- | --- | --- |
|  |  | Costs | QALYs |  |
| Baseline |  | 8626 | 0.80 | 10729 |
| Discounting = 0% | Upper | 2047 | 1.30 | 1575 |
| Discounting = 6% | Lower | 3610 | 0.01 | 344903 |
| Time horizon =20 years | Upper | 14639 | 0.58 | 25447 |
| Time horizon =5 years | Lower | 9683 | 0.77 | 12581 |
| Age =60 years | Upper | 11705 | 0.70 | 16765 |
| Age =30 years | Lower | -19709 | 1.64 | -12007 |
| Proportion Female (%)=1 | Upper | 5424 | 0.86 | 6297 |
| Proportion Female (%)=0 | Lower | 12925 | 0.73 | 17673 |
| Current Smoker (%)=1 | Upper | 10641 | 0.80 | 13382 |
| Current Smoker (%)=0 | Lower | 6674 | 0.20 | 34014 |
| HbA1c +25% | Upper | -20563 | 1.04 | -19772 |
| HbA1c -25% | Lower | 32246 | 0.52 | 61672 |
| Total Cholesterol (%) +25% | Upper | 9637 | 0.80 | 12096 |
| Total Cholesterol (%) -25% | Lower | 7568 | 0.81 | 9331 |
| HDL Cholesterol (%) +25% | Upper | 7957 | 0.82 | 9761 |
| HDL Cholesterol (%) -25% | Lower | 9658 | 0.78 | 12307 |
| SBP (mmHg) +25% | Upper | 10820 | 0.77 | 14096 |
| SBP (mmHg) -25% | Lower | 6734 | 0.83 | 8087 |
| Weight (kg) +25% | Upper | -20563 | 1.04 | -19772 |
| Weight (kg) -25% | Lower | 68437 | 0.85 | 80188 |
| HbA1c Treatment Effect (%) +25% | Upper | 10882 | 0.76 | 14321 |
| HbA1c Treatment Effect (%) -25% | Lower | 8933 | 0.80 | 11099 |
| Weight Treatment Effect (kg) +25% | Upper | 53621 | 2.92 | 18379 |
| Weight Treatment Effect (kg) -25% | Lower | 27679 | 1.77 | 15614 |
| Non-severe Hypoglycemia Rate +25% | Upper | 8626 | 0.81 | 10692 |
| Non-severe Hypoglycemia Rate -25% | Lower | 8626 | 0.80 | 10766 |
| Severe Hypoglycaemia Rates +25% | Upper | 8461 | 0.81 | 10499 |
| Severe Hypoglycaemia Rates -25% | Lower | 8790 | 0.80 | 10960 |
| Adverse Event Rates +25% | Upper | 8722 | 0.79 | 10975 |
| Adverse Event Rates -25% | Lower | 8529 | 0.81 | 10489 |
| Event Costs +25% | Upper | 9333 | 0.80 | 11608 |
| Event Costs -25% | Lower | 7919 | 0.80 | 9849 |
| BMI Costs +25% | Upper | -5653 | 0.80 | -7032 |
| BMI Costs -25% | Lower | 22905 | 0.80 | 28489 |
| Baseline Utility +25% | Upper | 8626 | 0.82 | 10472 |
| Baseline Utility -25% | Lower | 8626 | 0.78 | 10998 |
| Event Disutility +25% | Upper | 8626 | 0.80 | 10803 |
| Event Disutility -25% | Lower | 8626 | 0.81 | 10656 |
| BMI Utility +25% (0.0214; 0.059) | Upper | 8626 | 1.00 | 8625 |
| BMI Utility -25% (0.0128; 0.0354) | Lower | 8626 | 0.62 | 14022 |
| Scenario analysis: |  | Costs | QALYs | ICER (¥/QALY) |
| BMI utility=0.0061; 0.0061 |  | 8626 | 0.19 | 45548 |
| Base case analysis | Utility Decrement | +25% | -25% |  |
| Per unit decrease in BMI | 0.0171 | 0.0214 | 0.0128 |  |
| Per unit increase in BMI | 0.0472 | 0.059 | 0.0354 |  |
|  |  |  |  |  |

**
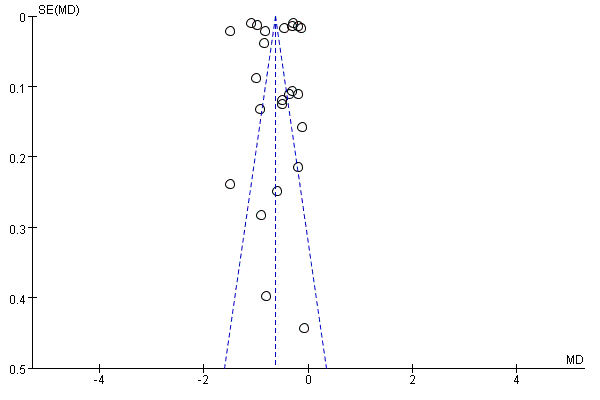
**

**Figure S1: Funnel plot of included studies with metformin treatment**

**
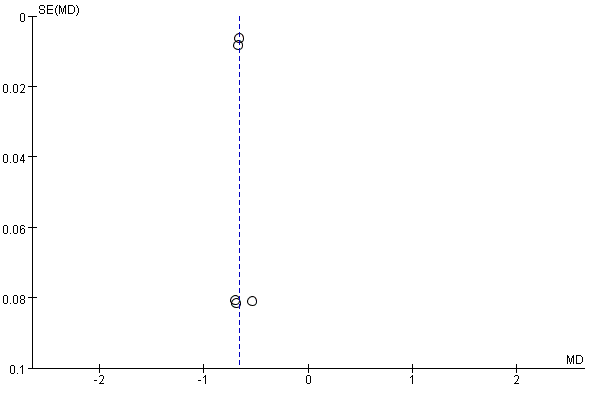
**

**Figure S2: Funnel plot of included studies with dapagliflozin treatment**

**Supplement Methods:**

***1. Search Strategy and Inclusion Criteria***

The databases of the MEDLINE and the Cochrane Library Central Register of Controlled Trials were searched in December 2016 and updated in July 2017. Randomized clinical trials publicly available before July 2017, comparing dapagliflozin treatment with placebo or active anti-diabetes drugs as monotherapy or add-on therapy as well as metformin treatment with placebo or active anti-diabetes drugs as monotherapy or add-on therapy in type 2 diabetes patients were identified. The search terms were: type 2 diabetes, sodium-glucose cotransporter 2 inhibitors, dapagliflozin, biguides, metformin, and randomized controlled trials.

The inclusion criteria were as follows: (1) placebo-controlled or active anti-diabetes drugs controlled trial of dapagliflozin treatment, (2) placebo-controlled or active anti-diabetes drugs controlled trial of metformin treatment, (3) type 2 diabetes participants, (4) the efficacy of glucose control was the primary outcome of the study, and (5) randomized controlled trials.

The exclusion criteria were as follows: (1) nonrandomized trial or observational study, (2) trials in type 1 diabetes, (3) the efficacy of glucose control was not the primary endpoint of the trial.

Two investigators (XYG and WJY) screened the titles and abstracts independently to identify potentially eligible trials. Then, relevant citation was evaluated in full-text. The two investigators independently reviewed the main reports and supplementary materials, and extracted study and patient characteristics and treatment strategies. The quality of each study and the risk of bias were evaluated using the Cochrane instrument.

***2. Endpoints***

The primary endpoint of this meta-analysis was absolute HbA1c change from baseline after dapagliflozin treatment and metformin treatment in type 2 diabetes patients.

The secondary endpoints were (1) absolute weight changes from baseline after dapagliflozin treatment and after metformin treatment; (2) absolute systolic blood pressure (SBP) changes from baseline after dapagliflozin treatment and after metformin treatment; (3) absolute total cholesterol (TCHO) changes from baseline after dapagliflozin treatment and after metformin treatment; (4) the risks of adverse effects including hypoglycemia, genital infection, urinary infection, gastrointestinal side effects and therapy discontinuation after dapagliflozin treatment and after metformin treatment.

***3 Statistical Analysis***

Treatment effects were estimated by random-effects or fixed-effects pairwise meta-analysis. The results were shown in the weighted mean difference (WMD) for HbA1c level, blood pressure level, lipid profile levels and body weight, and in the odds ratios (ORs) for all the adverse events and hypoglycemia, together with 95% confidence intervals (95% CI). Higgins *I*2 statistics were used to quantify the percentage of the total variance in the summary estimate due to between-study heterogeneity. Publication bias was assessed via a funnel plot vision. Statistical testing was two-sided, with P<0.05 considered statistically significant. Statistical analyses were performed with the STATA statistical software package (Version 11.0). This meta-analysis was conducted according to the Preferred Reporting Items for Systematic Reviews and Meta-Analyses (PRISMA) guidelines for conducting and reporting meta-analyses of randomized controlled trials (RCTs).

**Supplement references:**

1. Henry RR, Murray AV, Marmolejo MH, et al. Dapagliflozin, metformin XR, or both: initial pharmacotherapy for type 2 diabetes, a randomised controlled trial. International journal of clinical practice. 2012 May;66(5):446-56.

2. Rosenstock J, Vico M, Wei L, et al. Effects of dapagliflozin, an SGLT2 inhibitor, on HbA(1c), body weight, and hypoglycemia risk in patients with type 2 diabetes inadequately controlled on pioglitazone monotherapy. Diabetes care. 2012 Jul;35(7):1473-8.

3. Strojek K, Yoon KH, Hruba V, et al. Effect of dapagliflozin in patients with type 2 diabetes who have inadequate glycaemic control with glimepiride: a randomized, 24-week, double-blind, placebo-controlled trial. Diabetes, obesity & metabolism. 2011 Oct;13(10):928-38.

4. Ahren B, Gomis R, Standl E, et al. Twelve- and 52-week efficacy of the dipeptidyl peptidase IV inhibitor LAF237 in metformin-treated patients with type 2 diabetes. Diabetes care. 2004 Dec;27(12):2874-80.

5. Barnett AH, Huisman H, Jones R, et al. Linagliptin for patients aged 70 years or older with type 2 diabetes inadequately controlled with common antidiabetes treatments: a randomised, double-blind, placebo-controlled trial. Lancet. 2013 Oct 26;382(9902):1413-23.

6. Bergenstal RM, Forti A, Chiasson JL, et al. Efficacy and safety of taspoglutide versus sitagliptin for type 2 diabetes mellitus (T-emerge 4 trial). Diabetes Ther. 2012 Dec;3(1):13.

7. Berhanu P, Perez A, Yu S. Effect of pioglitazone in combination with insulin therapy on glycaemic control, insulin dose requirement and lipid profile in patients with type 2 diabetes previously poorly controlled with combination therapy. Diabetes, obesity & metabolism. 2007 Jul;9(4):512-20.

8. Borges JL, Bilezikian JP, Jones-Leone AR, et al. A randomized, parallel group, double-blind, multicentre study comparing the efficacy and safety of Avandamet (rosiglitazone/metformin) and metformin on long-term glycaemic control and bone mineral density after 80 weeks of treatment in drug-naive type 2 diabetes mellitus patients. Diabetes, obesity & metabolism. 2011 Nov;13(11):1036-46.

9. Bosi E, Camisasca RP, Collober C, et al. Effects of vildagliptin on glucose control over 24 weeks in patients with type 2 diabetes inadequately controlled with metformin. Diabetes care. 2007 Apr;30(4):890-5.

10. Bosi E, Ellis GC, Wilson CA, et al. Alogliptin as a third oral antidiabetic drug in patients with type 2 diabetes and inadequate glycaemic control on metformin and pioglitazone: a 52-week, randomized, double-blind, active-controlled, parallel-group study. Diabetes, obesity & metabolism. 2011 Dec;13(12):1088-96.

11. Brackenridge AL, Jackson N, Jefferson W, et al. Effects of rosiglitazone and pioglitazone on lipoprotein metabolism in patients with Type 2 diabetes and normal lipids. Diabetic medicine : a journal of the British Diabetic Association. 2009 May;26(5):532-9.

12. Charbonnel B, Karasik A, Liu J, et al. Efficacy and safety of the dipeptidyl peptidase-4 inhibitor sitagliptin added to ongoing metformin therapy in patients with type 2 diabetes inadequately controlled with metformin alone. Diabetes care. 2006 Dec;29(12):2638-43.

13. Xiaoyan C, Jing W, Xiaochun H, et al. Effects of vildagliptin versus saxagliptin on daily acute glucose fluctuations in Chinese patients with T2DM inadequately controlled with a combination of metformin and sulfonylurea. Curr Med Res Opin. 2016 Jun;32(6):1131-6.

14. Dailey GE, 3rd, Noor MA, Park JS, et al. Glycemic control with glyburide/metformin tablets in combination with rosiglitazone in patients with type 2 diabetes: a randomized, double-blind trial. The American journal of medicine. 2004 Feb 15;116(4):223-9.

15. DeFronzo RA, Burant CF, Fleck P, et al. Efficacy and tolerability of the DPP-4 inhibitor alogliptin combined with pioglitazone, in metformin-treated patients with type 2 diabetes. J Clin Endocrinol Metab. 2012 May;97(5):1615-22.

16. Derosa G, Salvadeo SA, D'Angelo A, et al. Rosiglitazone therapy improves insulin resistance parameters in overweight and obese diabetic patients intolerant to metformin. Arch Med Res. 2008 May;39(4):412-9.

17. Derosa G, Carbone A, D'Angelo A, et al. A randomized, double-blind, placebo-controlled trial evaluating sitagliptin action on insulin resistance parameters and beta-cell function. Expert Opin Pharmacother. 2012 Dec;13(17):2433-42.

18. Derosa G, Ragonesi PD, Carbone A, et al. Vildagliptin added to metformin on beta-cell function after a euglycemic hyperinsulinemic and hyperglycemic clamp in type 2 diabetes patients. Diabetes Technol Ther. 2012 Jun;14(6):475-84.

19. Dobs AS, Goldstein BJ, Aschner P, et al. Efficacy and safety of sitagliptin added to ongoing metformin and rosiglitazone combination therapy in a randomized placebo-controlled 54-week trial in patients with type 2 diabetes. J Diabetes. 2013 Mar;5(1):68-79.

20. Einhorn D, Rendell M, Rosenzweig J, et al. Pioglitazone hydrochloride in combination with metformin in the treatment of type 2 diabetes mellitus: a randomized, placebo-controlled study. The Pioglitazone 027 Study Group. Clinical therapeutics. 2000 Dec;22(12):1395-409.

21. Feinglos M, Dailey G, Cefalu W, et al. Effect on glycemic control of the addition of 2.5 mg glipizide GITS to metformin in patients with T2DM. Diabetes research and clinical practice. 2005 May;68(2):167-75.

22. Fonseca V, Rosenstock J, Patwardhan R, et al. Effect of metformin and rosiglitazone combination therapy in patients with type 2 diabetes mellitus: a randomized controlled trial. JAMA. 2000 Apr 5;283(13):1695-702.

23. Fonseca V, Staels B, Morgan JD, 2nd, et al. Efficacy and safety of sitagliptin added to ongoing metformin and pioglitazone combination therapy in a randomized, placebo-controlled, 26-week trial in patients with type 2 diabetes. J Diabetes Complications. 2013 Mar-Apr;27(2):177-83.

24. Forst T, Uhlig-Laske B, Ring A, et al. Linagliptin (BI 1356), a potent and selective DPP-4 inhibitor, is safe and efficacious in combination with metformin in patients with inadequately controlled Type 2 diabetes. Diabetic medicine : a journal of the British Diabetic Association. 2010 Dec;27(12):1409-19.

25. Garber AJ, Larsen J, Schneider SH, et al. Simultaneous glyburide/metformin therapy is superior to component monotherapy as an initial pharmacological treatment for type 2 diabetes. Diabetes, obesity & metabolism. 2002 May;4(3):201-8.

26. Garber AJ, Donovan DS, Jr., Dandona P, et al. Efficacy of glyburide/metformin tablets compared with initial monotherapy in type 2 diabetes. J Clin Endocrinol Metab. 2003 Aug;88(8):3598-604.

27. Gomez-Perez FJ, Fanghanel-Salmon G, Antonio Barbosa J, et al. Efficacy and safety of rosiglitazone plus metformin in Mexicans with type 2 diabetes. Diabetes Metab Res Rev. 2002 Mar-Apr;18(2):127-34.

28. Goodman M, Thurston H, Penman J. Efficacy and tolerability of vildagliptin in patients with type 2 diabetes inadequately controlled with metformin monotherapy. Horm Metab Res. 2009 May;41(5):368-73.

29. Haak T, Meinicke T, Jones R, et al. Initial combination of linagliptin and metformin improves glycaemic control in type 2 diabetes: a randomized, double-blind, placebo-controlled study. Diabetes, obesity & metabolism. 2012 Jun;14(6):565-74.

30. Hermansen K, Kipnes M, Luo E, et al. Efficacy and safety of the dipeptidyl peptidase-4 inhibitor, sitagliptin, in patients with type 2 diabetes mellitus inadequately controlled on glimepiride alone or on glimepiride and metformin. Diabetes, obesity & metabolism. 2007 Sep;9(5):733-45.

31. Jadzinsky M, Pfutzner A, Paz-Pacheco E, et al. Saxagliptin given in combination with metformin as initial therapy improves glycaemic control in patients with type 2 diabetes compared with either monotherapy: a randomized controlled trial. Diabetes, obesity & metabolism. 2009 Jun;11(6):611-22.

32. Ji LN, Pan CY, Lu JM, et al. Efficacy and safety of combination therapy with vildagliptin and metformin versus metformin uptitration in Chinese patients with type 2 diabetes inadequately controlled with metformin monotherapy: a randomized, open-label, prospective study (VISION). Diabetes, obesity & metabolism. 2016 Aug;18(8):775-82.

33. Kaku K. Efficacy and safety of therapy with metformin plus pioglitazone in the treatment of patients with type 2 diabetes: a double-blind, placebo-controlled, clinical trial. Curr Med Res Opin. 2009 May;25(5):1111-9.

34. Lavalle-Gonzalez FJ, Januszewicz A, Davidson J, et al. Efficacy and safety of canagliflozin compared with placebo and sitagliptin in patients with type 2 diabetes on background metformin monotherapy: a randomised trial. Diabetologia. 2013 Dec;56(12):2582-92.

35. Lv C YP, Zhou S, et al. [Eficacy and safety of saxagliptin combined metformin in newly diagnosed type 2 diabetes mellitus patients]. Chin J Diabetes Mellitus. 2013;5(12):759-762. Chinese.

36. Lukashevich V, Del Prato S, Araga M, et al. Efficacy and safety of vildagliptin in patients with type 2 diabetes mellitus inadequately controlled with dual combination of metformin and sulphonylurea. Diabetes, obesity & metabolism. 2014 May;16(5):403-9.

37. Li CJ, Liu XJ, Bai L, et al. Efficacy and safety of vildagliptin, Saxagliptin or Sitagliptin as add-on therapy in Chinese patients with type 2 diabetes inadequately controlled with dual combination of traditional oral hypoglycemic agents. Diabetol Metab Syndr. 2014;6:69.

38. Du J, Li L, Fang H, et al. Efficacy and safety of saxagliptin compared with acarbose in Chinese patients with type 2 diabetes mellitus uncontrolled on metformin monotherapy: results of a phase IV open-label randomized controlled study (the SMART study). Diabetes, obesity & metabolism. 2017 Nov;19(11):1513-1520.

39. Nauck M, Frid A, Hermansen K, et al. Efficacy and safety comparison of liraglutide, glimepiride, and placebo, all in combination with metformin, in type 2 diabetes: the LEAD (liraglutide effect and action in diabetes)-2 study. Diabetes care. 2009 Jan;32(1):84-90.

40. Nauck MA, Ellis GC, Fleck PR, et al. Efficacy and safety of adding the dipeptidyl peptidase-4 inhibitor alogliptin to metformin therapy in patients with type 2 diabetes inadequately controlled with metformin monotherapy: a multicentre, randomised, double-blind, placebo-controlled study. International journal of clinical practice. 2009 Jan;63(1):46-55.

41. Negro R, Mangieri T, Dazzi D, et al. Rosiglitazone effects on blood pressure and metabolic parameters in nondipper diabetic patients. Diabetes research and clinical practice. 2005 Oct;70(1):20-5.

42. Owens DR, Swallow R, Dugi KA, et al. Efficacy and safety of linagliptin in persons with type 2 diabetes inadequately controlled by a combination of metformin and sulphonylurea: a 24-week randomized study. Diabetic medicine : a journal of the British Diabetic Association. 2011 Nov;28(11):1352-61.

43. Pan C, Gao Y, Gao X, et al. [The efficacy and safety of pioglitazone hydrochloride in combination with sulphonylureas and metfomin in the treatment of type 2 diabetes mellitus a 12-week randomized multi-centres placebo-controlled parallel study]. Zhonghua Nei Ke Za Zhi. 2002 Jun;41(6):388-92. Chinese.

44. Pan C, Xing X, Han P, et al. Efficacy and tolerability of vildagliptin as add-on therapy to metformin in Chinese patients with type 2 diabetes mellitus. Diabetes, obesity & metabolism. 2012 Aug;14(8):737-44.

45. Pan C, Li W, Zeng J, et al. [Efficacy and safety of alogliptin in treatment of type 2 diabetes mellitus: a multicenter, randomized, double-blind, placebo-controlled phase III clinical trial in mainland China]. Zhonghua Nei Ke Za Zhi. 2015 Nov;54(11):949-53.Chinese.

46. Perez A, Zhao Z, Jacks R, et al. Efficacy and safety of pioglitazone/metformin fixed-dose combination therapy compared with pioglitazone and metformin monotherapy in treating patients with T2DM. Curr Med Res Opin. 2009 Dec;25(12):2915-23.

47. Raz I, Chen Y, Wu M, et al. Efficacy and safety of sitagliptin added to ongoing metformin therapy in patients with type 2 diabetes. Curr Med Res Opin. 2008 Feb;24(2):537-50.

48. Roberts VL, Stewart J, Issa M, et al. Triple therapy with glimepiride in patients with type 2 diabetes mellitus inadequately controlled by metformin and a thiazolidinedione: results of a 30-week, randomized, double-blind, placebo-controlled, parallel-group study. Clinical therapeutics. 2005 Oct;27(10):1535-47.

49. Rosenstock J, Brazg R, Andryuk PJ, et al. Efficacy and safety of the dipeptidyl peptidase-4 inhibitor sitagliptin added to ongoing pioglitazone therapy in patients with type 2 diabetes: a 24-week, multicenter, randomized, double-blind, placebo-controlled, parallel-group study. Clinical therapeutics. 2006 Oct;28(10):1556-68.

50. Rosenstock J, Aggarwal N, Polidori D, et al. Dose-ranging effects of canagliflozin, a sodium-glucose cotransporter 2 inhibitor, as add-on to metformin in subjects with type 2 diabetes. Diabetes care. 2012 Jun;35(6):1232-8.

51. Ross SA, Rafeiro E, Meinicke T, et al. Efficacy and safety of linagliptin 2.5 mg twice daily versus 5 mg once daily in patients with type 2 diabetes inadequately controlled on metformin: a randomised, double-blind, placebo-controlled trial. Curr Med Res Opin. 2012 Sep;28(9):1465-74.

52. Scheen AJ, Tan MH, Betteridge DJ, et al. Long-term glycaemic effects of pioglitazone compared with placebo as add-on treatment to metformin or sulphonylurea monotherapy in PROactive (PROactive 18). Diabetic medicine : a journal of the British Diabetic Association. 2009 Dec;26(12):1242-9.

53. Scott R, Loeys T, Davies MJ, et al. Efficacy and safety of sitagliptin when added to ongoing metformin therapy in patients with type 2 diabetes. Diabetes, obesity & metabolism. 2008 Sep;10(10):959-69.

54. Seino Y, Miyata Y, Hiroi S, et al. Efficacy and safety of alogliptin added to metformin in Japanese patients with type 2 diabetes: a randomized, double-blind, placebo-controlled trial with an open-label, long-term extension study. Diabetes, obesity & metabolism. 2012 Oct;14(10):927-36.

55. Sridhar S, Walia R, Sachdeva N, et al. Effect of pioglitazone on testosterone in eugonadal men with type 2 diabetes mellitus: a randomized double-blind placebo-controlled study. Clin Endocrinol (Oxf). 2013 Mar;78(3):454-9.

56. Stewart MW, Cirkel DT, Furuseth K, et al. Effect of metformin plus roziglitazone compared with metformin alone on glycaemic control in well-controlled Type 2 diabetes. Diabetic medicine : a journal of the British Diabetic Association. 2006 Oct;23(10):1069-78.

57. Taskinen MR, Rosenstock J, Tamminen I, et al. Safety and efficacy of linagliptin as add-on therapy to metformin in patients with type 2 diabetes: a randomized, double-blind, placebo-controlled study. Diabetes, obesity & metabolism. 2011 Jan;13(1):65-74.

58. Wang W, Yang J, Yang G, et al. Efficacy and safety of linagliptin in Asian patients with type 2 diabetes mellitus inadequately controlled by metformin: A multinational 24-week, randomized clinical trial. J Diabetes. 2016 Mar;8(2):229-37.

59. Yale JF, Valiquett TR, Ghazzi MN, et al. The effect of a thiazolidinedione drug, troglitazone, on glycemia in patients with type 2 diabetes mellitus poorly controlled with sulfonylurea and metformin. A multicenter, randomized, double-blind, placebo-controlled trial. Ann Intern Med. 2001 May 1;134(9 Pt 1):737-45.

60. Yang W, Pan CY, Tou C, et al. Efficacy and safety of saxagliptin added to metformin in Asian people with type 2 diabetes mellitus: a randomized controlled trial. Diabetes research and clinical practice. 2011 Nov;94(2):217-24.

61. Yang W, Guan Y, Shentu Y, et al. The addition of sitagliptin to ongoing metformin therapy significantly improves glycemic control in Chinese patients with type 2 diabetes. J Diabetes. 2012 Sep;4(3):227-37.

62. Araki E, Onishi Y, Asano M, et al. Efficacy and safety of dapagliflozin in addition to insulin therapy in Japanese patients with type 2 diabetes: Results of the interim analysis of 16-week double-blind treatment period. J Diabetes Investig. 2016 Jul;7(4):555-64.

63. Cefalu WT, Leiter LA, de Bruin TW, et al. Dapagliflozin's Effects on Glycemia and Cardiovascular Risk Factors in High-Risk Patients With Type 2 Diabetes: A 24-Week, Multicenter, Randomized, Double-Blind, Placebo-Controlled Study With a 28-Week Extension. Diabetes care. 2015 Jul;38(7):1218-27.

64. Wilding JP, Norwood P, T'Joen C, et al. A study of dapagliflozin in patients with type 2 diabetes receiving high doses of insulin plus insulin sensitizers: applicability of a novel insulin-independent treatment. Diabetes care. 2009 Sep;32(9):1656-62. doi: 10.2337/dc09-0517.

65. Wilding JP, Woo V, Soler NG, et al. Long-term efficacy of dapagliflozin in patients with type 2 diabetes mellitus receiving high doses of insulin: a randomized trial. Ann Intern Med. 2012 Mar 20;156(6):405-15.

66. Aviles-Santa L, Sinding J, Raskin P. Effects of metformin in patients with poorly controlled, insulin-treated type 2 diabetes mellitus. A randomized, double-blind, placebo-controlled trial. Ann Intern Med. 1999 Aug 3;131(3):182-8.

67. Douek IF, Allen SE, Ewings P, et al. Continuing metformin when starting insulin in patients with Type 2 diabetes: a double-blind randomized placebo-controlled trial. Diabetic medicine : a journal of the British Diabetic Association. 2005 May;22(5):634-40..

68. Gram J, Henriksen JE, Grodum E, et al. Pharmacological treatment of the pathogenetic defects in type 2 diabetes: the randomized multicenter South Danish Diabetes Study. Diabetes care. 2011 Jan;34(1):27-33.

69. Hermann LS, Kalen J, Katzman P, et al. Long-term glycaemic improvement after addition of metformin to insulin in insulin-treated obese type 2 diabetes patients. Diabetes, obesity & metabolism. 2001 Dec;3(6):428-34.

70. Kooy A, de Jager J, Lehert P, et al. Long-term effects of metformin on metabolism and microvascular and macrovascular disease in patients with type 2 diabetes mellitus. Arch Intern Med. 2009 Mar 23;169(6):616-25.
